# Supplementary material for: MiR-277/4989 regulate transcriptional landscape during juvenile to adult transition in the parasitic helminth Schistosoma mansoni
Source: PLoS Negl Trop Dis. 2017 May 23;11(5):e0005559. doi: 10.1371/journal.pntd.0005559 (PMC5459504; doi:10.1371/journal.pntd.0005559)
Supplement: S1 Table — (XLS) [file pntd.0005559.s006.xls]

## Sheet: results_table_edited.txt
Index	Seq ID	Count	Primer_type	Orientation	Start	Len	tm	GC%	Any compl	3' compl	Seq	Prod Size	Seq Length	Included Length	Pair any compl	Pair 3' compl
1	ID=Smp_152790.1:3utr;Parent=Smp_152790.1	1	Generic	FORWARD	10	22	59.33	45.45	6	0	TGGATCTCTTGACAGTTCCTTG	354	513	513	3	0
1	ID=Smp_152790.1:3utr;Parent=Smp_152790.1	1	Generic	REVERSE	363	20	60.3	40	4	1	GAAAAACGATGGGCATTTTG
2	ID=Smp_149640.1:3utr;Parent=Smp_149640.1	1	Generic	FORWARD	152	20	59.93	50	4	2	CTTTCGACCCCACCTGATTA	348	539	539	4	1
2	ID=Smp_149640.1:3utr;Parent=Smp_149640.1	1	Generic	REVERSE	499	21	59.69	42.86	4	0	TCCTCATAAAGCCAAGGACAA
3	ID=Smp_147920.1:3utr;Parent=Smp_147920.1	1	Generic	FORWARD	162	21	59.47	42.86	6	0	TGAGGTCAGCTGTGAAAACAA	335	551	551	5	3
3	ID=Smp_147920.1:3utr;Parent=Smp_147920.1	1	Generic	REVERSE	496	22	59.29	45.45	3	2	CTGTTATCCTCAAGTGCCGTAA
4	ID=Smp_144140.1:3utr;Parent=Smp_144140.1	1	Generic	FORWARD	185	22	59.75	50	5	2	AGCTGTGACTGTCTTTGCTACG	286	556	556	4	1
4	ID=Smp_144140.1:3utr;Parent=Smp_144140.1	1	Generic	REVERSE	470	21	60.21	38.1	2	0	TCCCAATAAAAACGAACACCA
5	ID=Smp_200240.1:3utr;Parent=Smp_200240.1	1	Generic	FORWARD	193	18	59.86	55.56	2	2	CGGGGTGGAGGAAAGAAT	326	519	519	5	3
5	ID=Smp_200240.1:3utr;Parent=Smp_200240.1	1	Generic	REVERSE	518	20	60.65	40	4	0	AATTGCGCTTCATTCGTGTT
6	ID=Smp_159780.1:3utr;Parent=Smp_159780.1	1	Generic	FORWARD	22	21	59.38	42.86	6	2	GAAGGACGATGAATCCATTTG	357	605	605	3	2
6	ID=Smp_159780.1:3utr;Parent=Smp_159780.1	1	Generic	REVERSE	378	21	59.23	47.62	8	0	GCACTGGGTAACCAGAAAAGA
8	ID=Smp_186020.1:3utr;Parent=Smp_186020.1	1	Generic	FORWARD	28	20	59.99	55	2	0	GCGAAAGGTGAGAGGAGTTG	350	535	535	4	1
8	ID=Smp_186020.1:3utr;Parent=Smp_186020.1	1	Generic	REVERSE	377	20	59.82	50	6	2	CTGGAATCGCATACGACTGA
9	ID=Smp_159570.1:3utr;Parent=Smp_159570.1	1	Generic	FORWARD	284	20	60.07	55	5	2	CTGGGACTCCTCGTTATCCA	296	581	581	2	1
9	ID=Smp_159570.1:3utr;Parent=Smp_159570.1	1	Generic	REVERSE	579	22	59.72	36.36	7	3	TCAATTTGACCGTTTCTTCTGA
10	ID=Smp_133210.1:3utr;Parent=Smp_133210.1	1	Generic	FORWARD	5	20	58.96	40	2	0	TATGCGTTTTTGCTTCGTTC	298	527	527	7	2
10	ID=Smp_133210.1:3utr;Parent=Smp_133210.1	1	Generic	REVERSE	302	22	58.65	40.91	6	2	AAGCAAACAGACAATTGAGAGC
11	ID=Smp_213910.1:3utr;Parent=Smp_213910.1	1	Generic	FORWARD	8	21	58.58	47.62	4	0	GCACTCATACCCACAGATGAA	358	582	582	4	3
11	ID=Smp_213910.1:3utr;Parent=Smp_213910.1	1	Generic	REVERSE	365	21	59.08	33.33	7	2	AAAAAGCGGGTCGTTTTTAAT
12	ID=Smp_154340.1:3utr;Parent=Smp_154340.1	1	Generic	FORWARD	9	20	60.17	50	4	2	TAAGTACCGTTGGACGCACA	330	576	576	4	3
12	ID=Smp_154340.1:3utr;Parent=Smp_154340.1	1	Generic	REVERSE	338	20	59.26	50	4	2	TGGTGACTGAGGATGCAACT
